# Supplementary material for: The Human Proteoform Project: Defining the human proteome
Source: PubMed Central journal article supplement (PMC8589312; doi:10.1126/sciadv.abk0734), 2021-11-12
Supplement: sciadv.abk0734_sm.pdf [file sciadv.abk0734_sm.pdf]

## Supplementary Materials for

### **The Human Proteoform Project: Defining the human proteome**

Lloyd M. Smith, Jeffrey N. Agar, Julia Chamot-Rooke, Paul O. Danis,  
Ying Ge, Joseph A. Loo, Ljiljana Paša-Tolić, Yury O. Tsybin, Neil L. Kelleher\*,  
The Consortium for Top-Down Proteomics

\*Corresponding author: [n-kelleher@northwestern.edu](mailto:n-kelleher@northwestern.edu)

Published 12 November 2021, *Sci. Adv.* 7, eabk0734 (2021)  
DOI: 10.1126/sciadv.abk0734

#### **This PDF file includes:**

Consortium for Top-Down Proteomics

## **Consortium for Top-Down Proteomics**

- Paul O. Danis, Consortium for Top-Down Proteomics
  - Chief Executive Officer
- Neil L. Kelleher, Northwestern University
  - President, Board of Directors
- Lloyd M. Smith, University of Wisconsin
  - Treasurer, Board of Directors
- Ying Ge, University of Wisconsin
  - Secretary, Board of Directors
- Jeff N. Agar, Northeastern University
  - Board of Directors, Member At-Large
- Julia Chamot-Rooke, Institut Pasteur
  - Board of Directors, Member At-Large
- Joseph A. Loo, University of California, Los Angeles
  - Board of Directors, Member At-Large
- Ljiljana Paša-Tolić, Pacific Northwest National Laboratory
  - Board of Directors, Member At-Large
- Yury O. Tsybin, Spectroswiss Sàrl
  - Board of Directors, Member At-Large
